# Supplementary material for: Influence of nitrogen limitation on the bioaccumulation kinetics of hematite nanoparticles in the freshwater alga Euglena intermedia
Source: Royal Society of Chemistry journal article supplement (doi:10.1039/c7en00477j), 2017-01-01
Supplement: c7en00477j1.pdf [file c7en00477j1.pdf]

**Supporting Information for**

**Influence of nitrogen limitation on the bioaccumulation kinetics  
of hematite nanoparticles in the freshwater alga *Euglena*  
*intermedia***

Bin Huang, Ai-Jun Miao\*, Lin Xiao\*, Liu-Yan Yang

State Key Laboratory of Pollution Control and Resource Reuse, School of the Environment,  
Nanjing University, Nanjing, Jiangsu Province, 210046, China

8 pages, including 3 Tables and 4 Figures

\*Corresponding authors:

A.-J. Miao, School of the Environment, Nanjing University, Mail box 24, Xianlin Road 163,  
Nanjing 210046, Jiangsu Province, China PRC (mailing address), 86-25-89680255 (phone),  
86-25-89680569 (fax), miaoaj@nju.edu.cn (email)

L. Xiao, School of the Environment, Nanjing University, Mail box 24, Xianlin Road 163,  
Nanjing 210046, Jiangsu Province, China PRC (mailing address), 86-25-89680556 (phone),

22 86-25-89680569 (fax), xiaolin@nju.edu.cn (email)

23 **Table S1** Chemical components and their concentrations in HUT.

| Components                            | Final concentration<br>(mg L <sup>-1</sup> ) | Components              | Final concentration<br>(mg L <sup>-1</sup> ) |
|---------------------------------------|----------------------------------------------|-------------------------|----------------------------------------------|
| proteose peptone                      | 600                                          | CH <sub>3</sub> COONa   | 400                                          |
| yeast extract                         | 400                                          | potassium citrate       | 40                                           |
| KH <sub>2</sub> PO <sub>4</sub>       | 20                                           | Vitamin B <sub>1</sub>  | 0.0004                                       |
| MgSO <sub>4</sub> • 7H <sub>2</sub> O | 25                                           | Vitamin B <sub>12</sub> | 0.0005                                       |

25 **Table S2** Chemical components and their concentrations in AF-6.

| Components                           | Final concentration<br>(mg L <sup>-1</sup> ) | Components                                          | Final concentration<br>(mg L <sup>-1</sup> ) |
|--------------------------------------|----------------------------------------------|-----------------------------------------------------|----------------------------------------------|
| NH <sub>4</sub> NO <sub>3</sub>      | 198.1                                        | Na <sub>2</sub> EDTA                                | 0.75                                         |
| CaCl <sub>2</sub> ·2H <sub>2</sub> O | 147                                          | FeCl <sub>3</sub> ·6H <sub>2</sub> O                | 0.097                                        |
| MgSO <sub>4</sub> ·7H <sub>2</sub> O | 246.7                                        | MnCl <sub>2</sub> ·4H <sub>2</sub> O                | 0.041                                        |
| KH <sub>2</sub> PO <sub>4</sub>      | 34                                           | ZnCl <sub>2</sub> ·7H <sub>2</sub> O                | 0.005                                        |
| CaCO <sub>3</sub>                    | 10                                           | Na <sub>2</sub> MoO <sub>4</sub> ·2H <sub>2</sub> O | 0.004                                        |
| Citric acid                          | 2                                            | CoCl <sub>2</sub> ·6H <sub>2</sub> O                | 0.002                                        |
| Fe-citrate                           | 2                                            |                                                     |                                              |

27 **Table S3** Full names of the abbreviations used throughout the text.

| Abbreviation              | Full name                                                                                            |
|---------------------------|------------------------------------------------------------------------------------------------------|
| HemNPs                    | polyacrylate-coated hematite ( $\alpha$ -Fe <sub>2</sub> O <sub>3</sub> ) nanoparticles              |
| QDs                       | quantum dots                                                                                         |
| -N                        | nitrogen-depleted                                                                                    |
| NE                        | nutrient-enriched                                                                                    |
| TEM                       | transmission electron microscopy                                                                     |
| DLS                       | dynamic light scattering particle sizer                                                              |
| RCF                       | relative centrifugal force                                                                           |
| [HemNPs] <sub>cell</sub>  | HemNP concentration in the cells (pg-Fe $\mu\text{m}^{-3}$ )                                         |
| [HemNPs] <sub>med</sub>   | HemNP concentration in the experimental medium (mg-Fe L <sup>-1</sup> )                              |
| [HemNPs] <sub>ads</sub>   | cell-surface-adsorbed concentration of HemNPs (pg-Fe $\mu\text{m}^{-3}$ )                            |
| [HemNPs] <sub>intra</sub> | intracellular concentration of HemNPs (pg-Fe $\mu\text{m}^{-3}$ )                                    |
| $k_u$                     | uptake rate constant of HemNPs (L $\mu\text{m}^{-3}$ h <sup>-1</sup> )                               |
| $k_e$                     | efflux rate constant of HemNPs (h <sup>-1</sup> )                                                    |
| $\mu$                     | cell-specific growth rate (h <sup>-1</sup> )                                                         |
| $F_v/F_m$                 | maximum photosynthetic system II quantum yield                                                       |
| Water-PAM                 | Water Pulse Amplitude Modulated Fluorometer                                                          |
| GF/F membrane             | glass fiber/fine membrane                                                                            |
| SSC                       | side scatter                                                                                         |
| [PS] <sub>surf</sub>      | amount of polysaccharide attached on the cell surface (fg-Xanthan <sub>eq</sub> $\mu\text{m}^{-3}$ ) |
| [CHO] <sub>cell</sub>     | cellular carbohydrate concentration ( $\mu\text{mol } \mu\text{m}^{-3}$ )                            |
| [PS] <sub>dis</sub>       | amount of polysaccharides released into the culture medium ( $\mu\text{M}$ )                         |
| ANOVA                     | analysis of variance                                                                                 |
| EDX                       | energy dispersive X-ray spectrometry                                                                 |

28

29

30

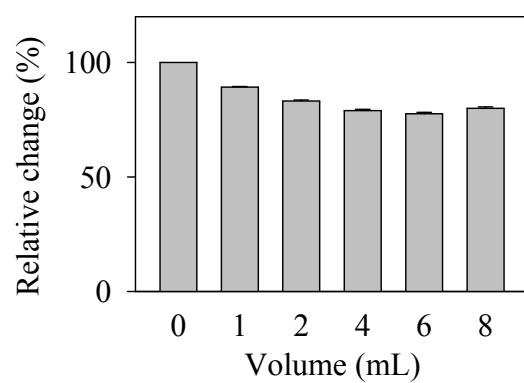

31

32 **Fig. S1** Relative change of the cellular HemNP concentration ( $[\text{HemNPs}]_{\text{cell}}$ ) with increasing  
33 volume of rinsing solution (i.e., AF-6).

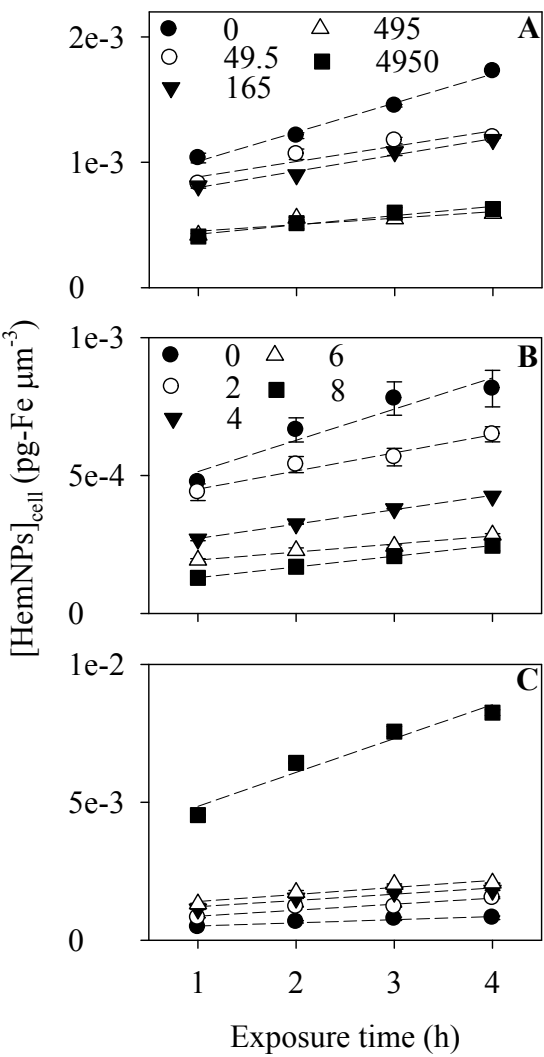

35

36 **Fig. S2** The increase in the cellular HemNP concentration ( $[\text{HemNPs}]_{\text{cell}}$ ) with increasing  
37 exposure time in *Euglena intermedia* pre-cultured (A) in the experimental medium with  
38 different concentrations of nitrogen (0, 49.5, 165, 495, and 4950  $\mu\text{M}$ ) for 2 days as well as in  
39 (B) the nutrient-enriched and (C) nitrogen-depleted media for 0, 2, 4, 6, and 8 days before the  
40 4-h uptake experiment. Dashed lines are the linear regression between  $[\text{HemNPs}]_{\text{cell}}$  and  
41 exposure time. The data are reported as the mean  $\pm$  standard deviation ( $n = 3$ ).

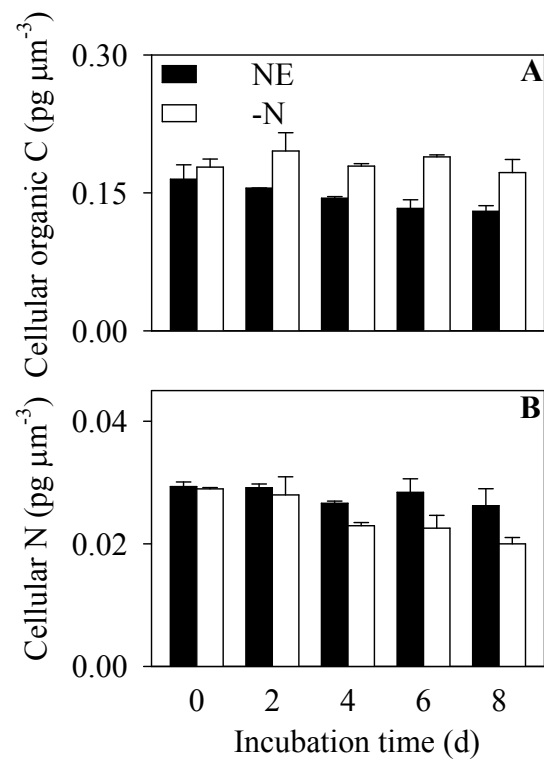

43

44 **Fig. S3** The cellular (A) organic carbon and (B) nitrogen concentrations in *Euglena intermedia*

45 pre-cultured in the nutrient-enriched (NE) and nitrogen-depleted (-N) media for 0, 2, 4, 6, and

46 8 days. The data are reported as the mean  $\pm$  standard deviation (n = 3).

47



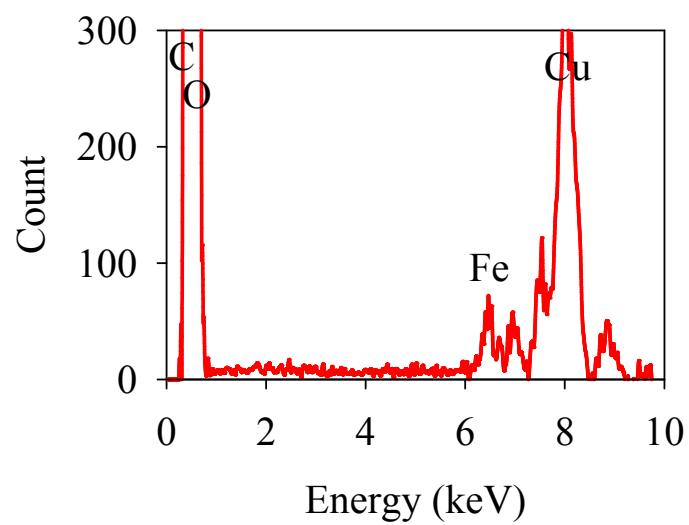

48

49 **Fig. S4** Representative elemental composition of the arrowed spots in the TEM images of Fig.

50 2B and C, as investigated by energy dispersive X-ray (EDX) spectrometry.
